# Supplementary material for: Reassembling nanometric magnetic subunits into secondary nanostructures with controlled interparticle spacing
Source: Royal Society of Chemistry journal article supplement (doi:10.1039/c4ra12115e), 2014-11-24
Supplement: c4ra12115e1.pdf [file c4ra12115e1.pdf]

## Supplementary Informations

### **Reassembling nanometric magnetic subunits into secondary nanostructures with controlled interparticle spacing**

Koushik Saikia<sup>1</sup>, Debasis Sen<sup>2</sup>, Subhasish Mazumder<sup>2</sup> and Pritam Deb<sup>1\*</sup>

<sup>1</sup> Advanced Functional Material Laboratory (AFML), Tezpur University (Central University),  
Tezpur, India.

<sup>2</sup> Solid State Physics Division, Bhabha Atomic Research Centre, Mumbai 400085, India.

**ESI 1:** The figure S1 shows the FTIR of IO<sub>NPs</sub>@OA. The binding of oleic acid molecules to the nanoparticle surface through carboxylate group is confirmed from the asymmetric  $\nu_{as}(\text{COO}^-)$  and  $\nu_s(\text{COO}^-)$  symmetric stretching vibrations at 1619 cm<sup>-1</sup> and 1525 cm<sup>-1</sup> respectively.<sup>1</sup> The chelating bidentate binding configuration is ensured from the obtained splitting difference  $\Delta$  (1619-1525 cm<sup>-1</sup> = 99 cm<sup>-1</sup> < 110 cm<sup>-1</sup>) of these two stretching modes. The band at 1414 cm<sup>-1</sup> is attributed to the bending vibration of CH<sub>3</sub>.<sup>2</sup> The band observed at 573 cm<sup>-1</sup> corresponds to vibration of the Fe–O functional group.<sup>3</sup> Two bands at 2915 cm<sup>-1</sup> and 2854 cm<sup>-1</sup> are attributed to the asymmetric CH<sub>2</sub> stretching and the symmetric CH<sub>2</sub> stretching respectively.<sup>1</sup>

**Figure S1.**

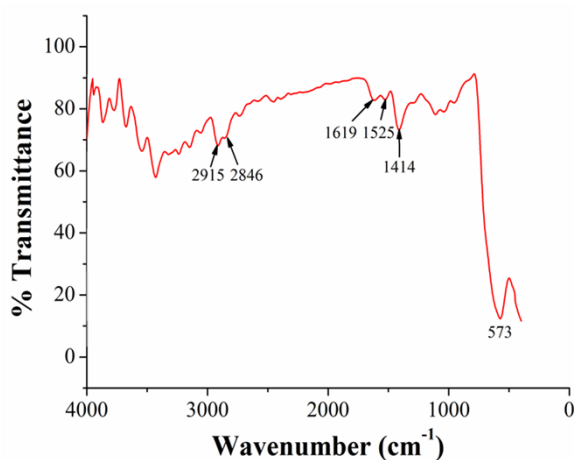

**ESI 2: Zeta potential Measurement:** For zeta potential measurement both  $\text{IO}_{\text{agg}}@\text{CTAB}$  and  $\text{IO}_{\text{NPCs}}@\text{PAA}$  samples were diluted to same concentration. Zeta cells were equilibrated at 25 °C for two minutes before recording three measurements each of ten runs. Data was collected with automatic attenuation selected and analysed using the Smoluchowski model. Zeta potential of PAA was measured in the pH range 2 to 13.

Figure S2 (a), (b) and (c) show the zeta potential of  $\text{IO}_{\text{agg}}@\text{CTAB}$ , PAA and  $\text{IO}_{\text{NPCs}}@\text{PAA}$  respectively.

**Figure S2 (a):**

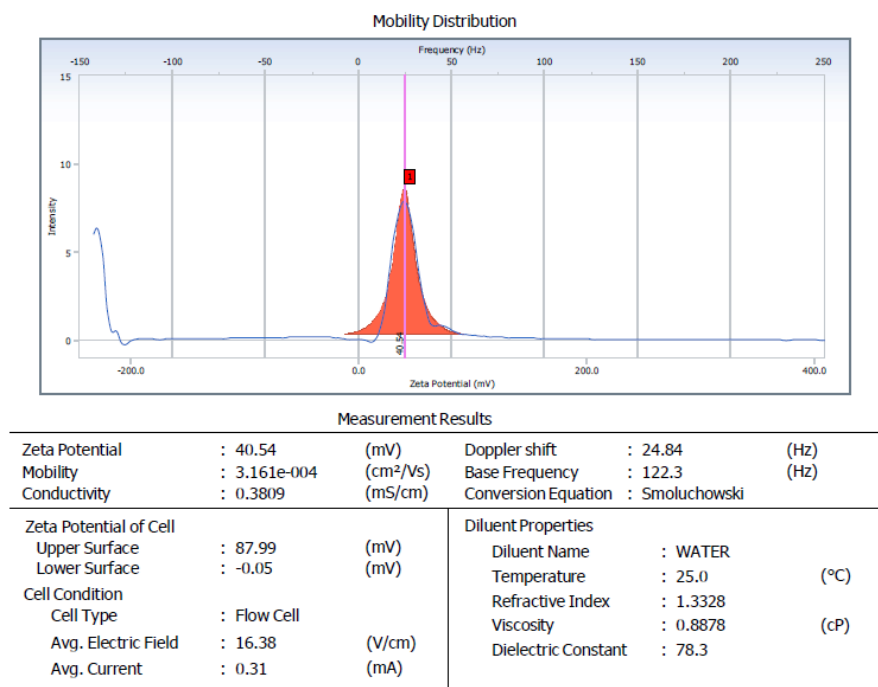

**Figure S2 (b):**

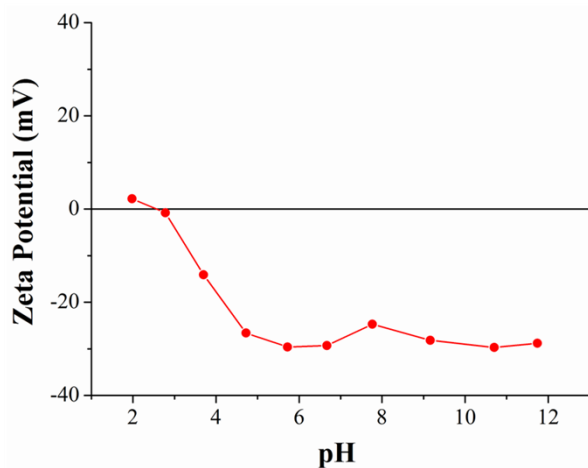

**Figure S 2(c):**

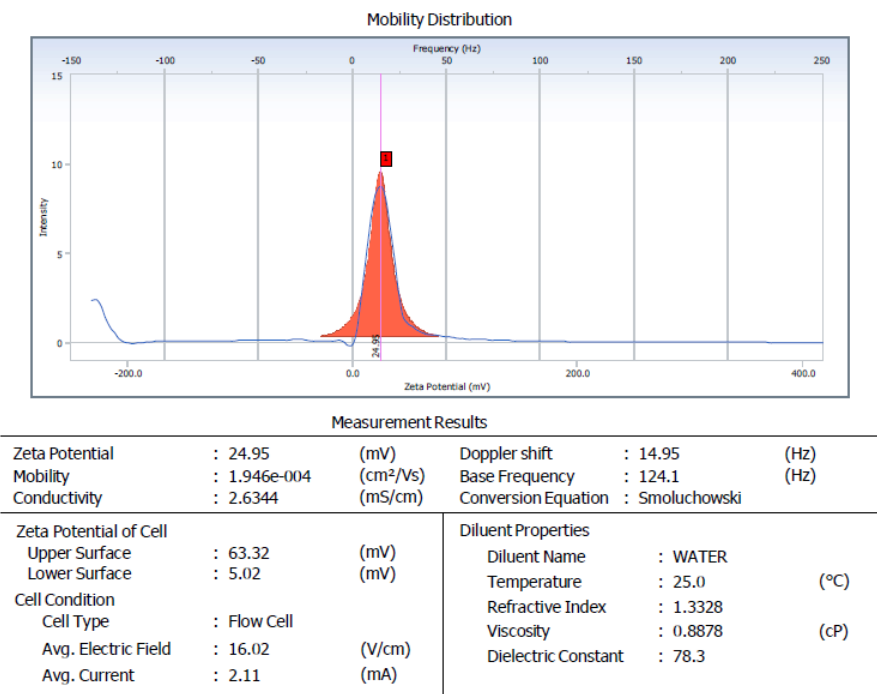

**ESI 3: Length scales estimated from SANS**

| Systems                 | Length scales (mu) in nm | Polydispersity( $\sigma$ ) | $f_p$ |
|-------------------------|--------------------------|----------------------------|-------|
| IO <sub>NPs</sub> @OA   | 58.30                    | 0.179                      |       |
|                         | 365.04                   | 0.274                      |       |
|                         | 8.19                     | 0.274                      |       |
| IO <sub>agg</sub> @CTAB | 48.00                    | 0.220                      | 0.444 |
|                         | 384.61                   | 0.347                      | 0.303 |
|                         | 8.30                     | 0.390                      |       |
| IO <sub>NPCs</sub> @PAA | 55.32                    | 0.308                      | 0.353 |
|                         | 410.18                   | 0.258                      |       |

**ESI 4:** Figure S4 shows the XRD pattern of IO<sub>NPs</sub>@OA. Bragg reflections in the 2θ range 10-70° correspond to those of γ-Fe<sub>2</sub>O<sub>3</sub> phase with cubic inverse spinel structure (PDF card 895892).

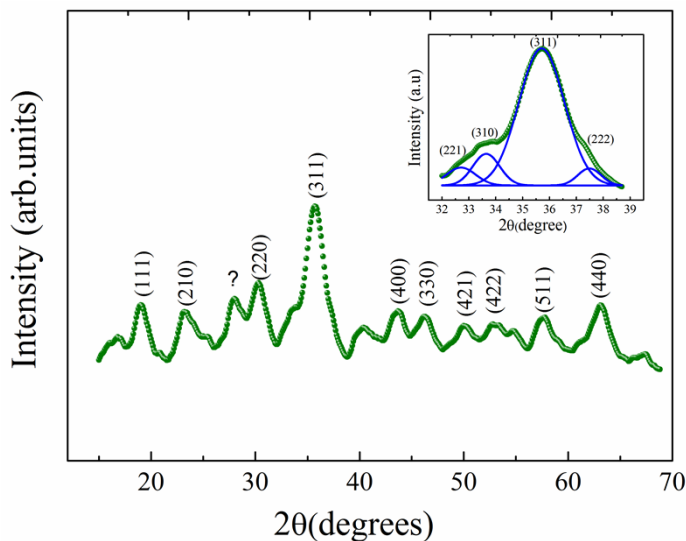

**ESI 5:** The figure shows the FTIR of the three systems in the low wavenumber region. The major peak at 565 cm<sup>-1</sup> is attributed to the Fe-O stretching mode of magnetite,<sup>4</sup> while shoulder peaks at 450 cm<sup>-1</sup> and 630 cm<sup>-1</sup> are the signature of maghemite phase.<sup>4</sup>

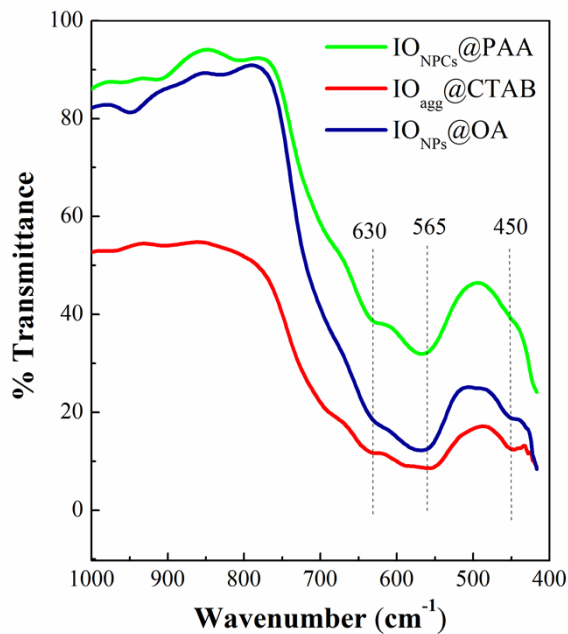

**ESI 6:** Table shows the Raman peak positions for three systems with their assignments.

| <i>IO<sub>NPs</sub>@OA</i> | <i>IO<sub>agg</sub>@CTAB</i>        | <i>IO<sub>NPCs</sub>@PAA</i> | <i>Assignment</i> |
|----------------------------|-------------------------------------|------------------------------|-------------------|
| 194 (T <sub>2g</sub> )     | 194 (T <sub>2g</sub> )              |                              | magnetite         |
| 302 (E <sub>g</sub> )      | 294 <sup>a</sup> (E <sub>g</sub> )  | 303 (E <sub>g</sub> )        | magnetite         |
| 375(E <sub>g</sub> )       | 356 (E <sub>g</sub> )               | 366 (E <sub>g</sub> )        | maghemite         |
|                            | 425 <sup>b</sup> (E <sub>g</sub> )  |                              | magnetite         |
| 484 (T <sub>2g</sub> )     | 494 <sup>c</sup> (T <sub>2g</sub> ) | 480(T <sub>2g</sub> )        | magnetite         |
| 664 (A <sub>1g</sub> )     | 663 (A <sub>1g</sub> )              | 664(A <sub>1g</sub> )        | magnetite         |
| 714(A <sub>1g</sub> )      | 723 (A <sub>1g</sub> )              | 714(A <sub>1g</sub> )        | maghemite         |

### References:

- [1] L. Zhang, R. He, and H.C. Gu, *Appl. Surf. Sci.*, 2006, **253**, 2611.
- [2] H.M. Yang, H. J. Lee, K.S. Jang, C. W. Park, H. W. Yang, W. D. Heo and J.D. Kim, *J. Mater. Chem.*, 2009, **19**, 4566.
- [3] A. Hofmann, S. Thierbach, A. Semisch, A. Hartwig, M. Taupitz, E. Ruhl and C. Graf, *J. Mater. Chem.*, 2010, **20**, 7842.
- [4] S. Nasrazadani and H. Namduri, *Spectrochimica Acta Part B*, 2006, **61**, 565.
